# Supplementary material
Source: publisher figshare collection journal article supplement (https://acs.figshare.com/ndownloader/files/4141390)
Supplement: Supplementary file 1 [file 4141390]

## Supporting Information for

### Using Solid-State NMR to Monitor the Molecular Consequences of *Cryptococcus neoformans* Melanization with Different Catecholamine Precursors

Subhasish Chatterjee,<sup>†</sup> Rafael Prados-Rosales,<sup>‡</sup> Susana Frases,<sup>‡,⊥</sup> Boris Itin,<sup>§</sup> Arturo Casadevall,<sup>‡</sup>  
and Ruth E. Stark\*,<sup>†</sup>

<sup>†</sup>Department of Chemistry, City College of New York, Graduate Center and Institute for  
Macromolecular Assemblies, City University of New York, New York, New York 10031,  
United States

<sup>‡</sup>Department of Microbiology and Immunology, Albert Einstein College of Medicine, Yeshiva  
University, Bronx, New York 10461, United States

<sup>§</sup>New York Structural Biology Center, New York, New York 10027, United States

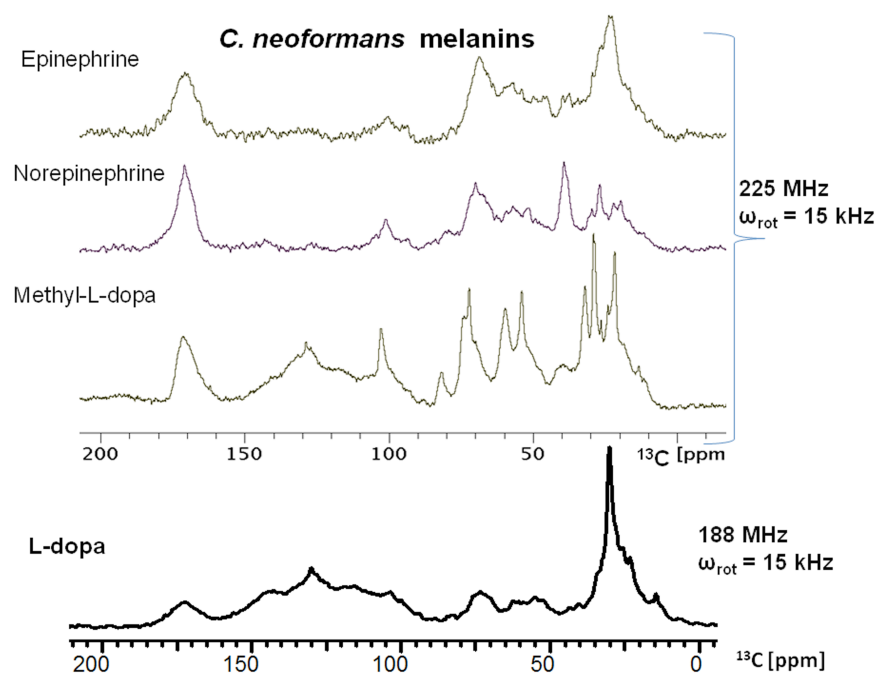

**Figure S1.** 188 and 225 MHz CPMAS solid-state  $^{13}\text{C}$  NMR spectra of *C. neoformans* melanins obtained by *in vitro* biosynthesis, showing enhanced resolution as compared with analogous spectra at a  $^{13}\text{C}$  frequency of 150 MHz (Figure 1). Comparisons of the L-dopa and epinephrine melanin spectra in Figures 1 and S1, which are derived from separate fungal preparations, also attest to the reproducibility of the growth and extraction procedures.

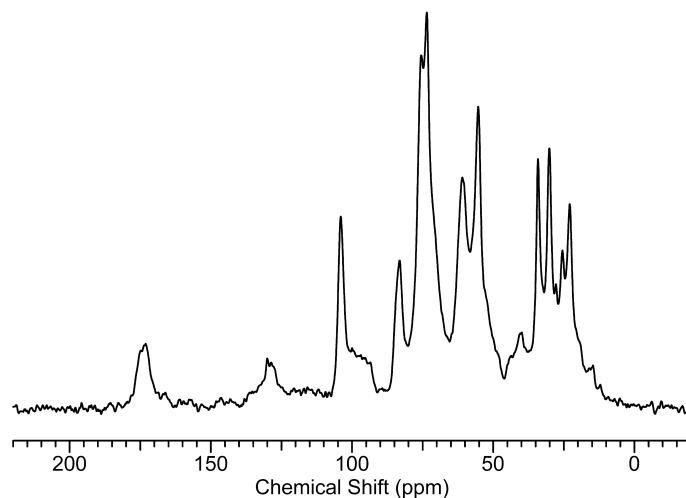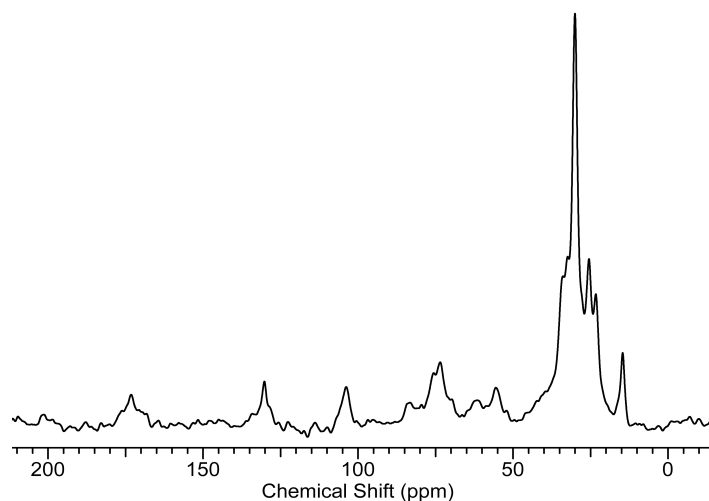

**Figure S2.** (Top) 150 MHz  $^{13}\text{C}$  CPMAS Spectrum of *C. neoformans* melanin produced with norepinephrine and  $\text{U-}^{13}\text{C}$ -glucose. The spectrum was acquired at 15 kHz spinning frequency. (Bottom) 150 MHz  $^{13}\text{C}$  CPMAS Spectrum of *C. neoformans* melanin produced with epinephrine and  $\text{U-}^{13}\text{C}$ -glucose. The spectrum was acquired at 10 kHz spinning frequency.

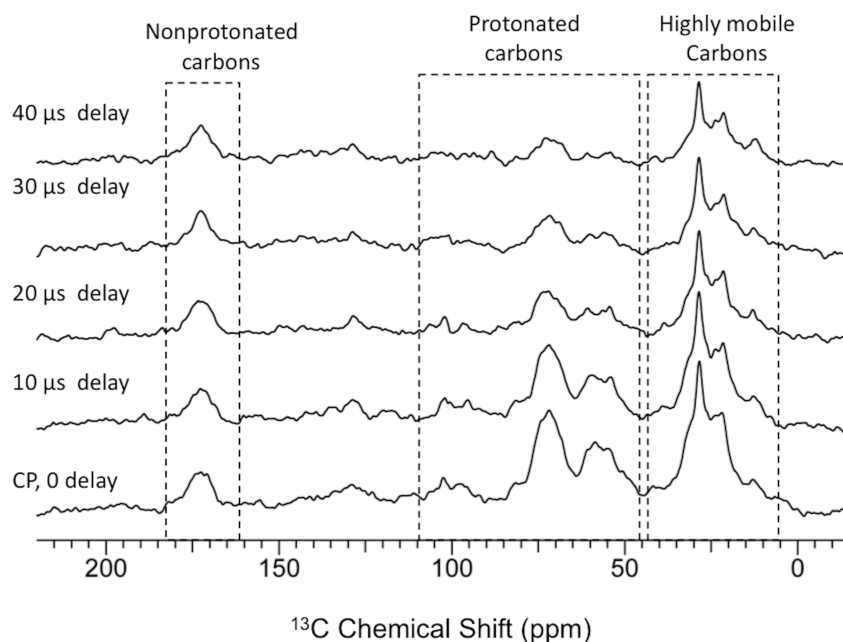

**Figure S3.** 150 MHz CPMAS solid-state  $^{13}\text{C}$  spectra of *C. neoformans* melanin produced with natural abundance L-dopa and  $[\text{U-}^{13}\text{C}_6]$ -glucose. All data were acquired at a 10 kHz spinning frequency and with delayed decoupling, the introduction of a series of time delays (10-40  $\mu\text{s}$ ) in the proton decoupling which permitted the dephasing of NMR signals from rigid singly and doubly protonated carbons.

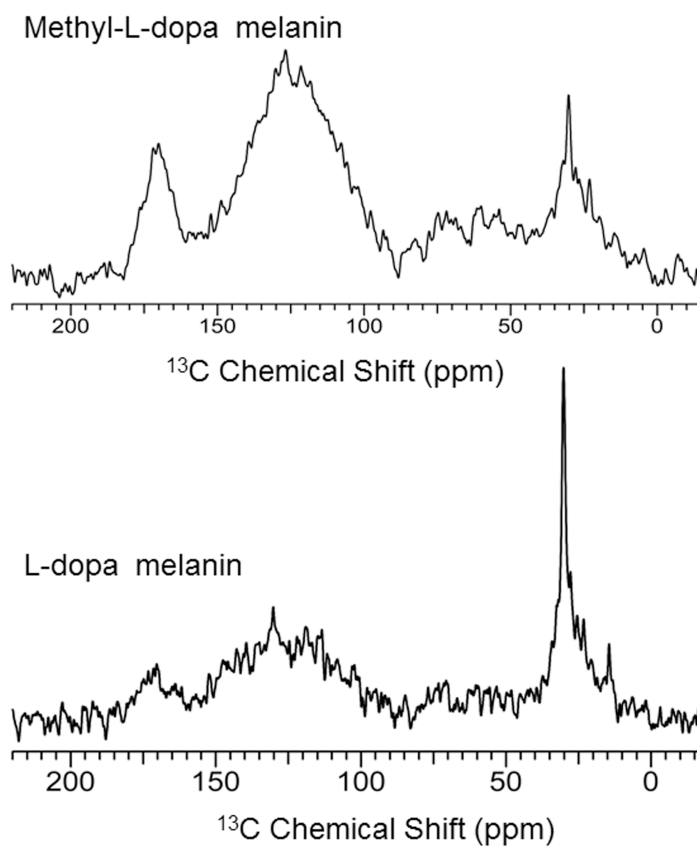

**Figure S4.** 150 MHz  $^{13}\text{C}$  DPMAS spectra of *C. neoformans* melanins produced with L-dopa and methyl-L-dopa. All spectra were acquired at a 15 kHz spinning speed.

CN Melanin made with Epinephrine and U-<sup>13</sup>C-glucose

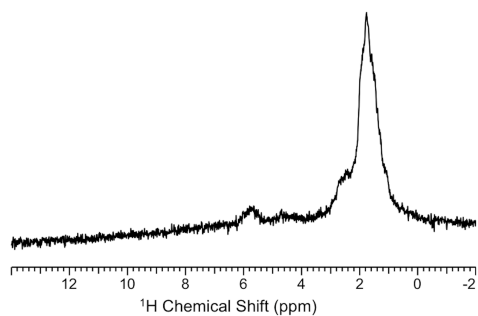

CN Melanin made with Norepinephrine and U-<sup>13</sup>C-glucose

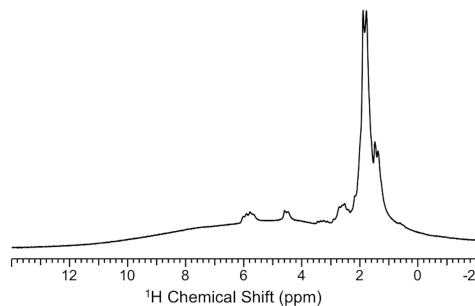

CN Melanin made with L-dopa and U-<sup>13</sup>C-glucose

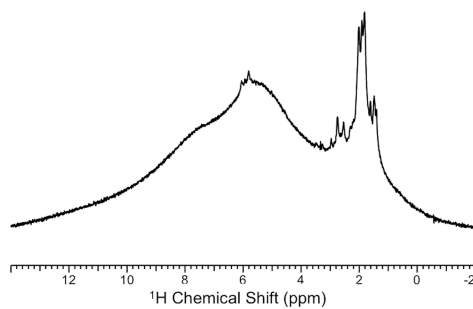

**Figure S5.** Solid-state MAS <sup>1</sup>H spectra of *C. neoformans* (CN) melanins produced from U-<sup>13</sup>C-glucose and natural abundance L-dopa, norepinephrine, and epinephrine acquired at a <sup>1</sup>H frequency of 600 MHz. A spinning rate of 35 kHz was used to acquire all spectra except for epinephrine, which was obtained at 15 kHz; chemical shifts were referenced indirectly, using a calculation from gyromagnetic ratios of <sup>1</sup>H and <sup>13</sup>C according to IUPAC recommendations. <sup>1</sup>

## Reference Cited

- (1) Harris, R. K.; Becker, E. D.; Cabral de Menezes, S. M.; Goodfellow, R.; Granger, P. *Solid State Nucl Mag* **2002**, 22, 458.
